# Supplementary material
Source: Springer Nature journal article supplement (https://www.springermedizin.de/resource/supplementary/12871_2014_239_MOESM1_ESM.pdf/9429214)

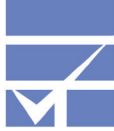

## CONSORT 2010 Flow Diagram

**“Blood pressure response to combined general anaesthesia / interscalene brachial plexus block for outpatient shoulder arthroscopy”**

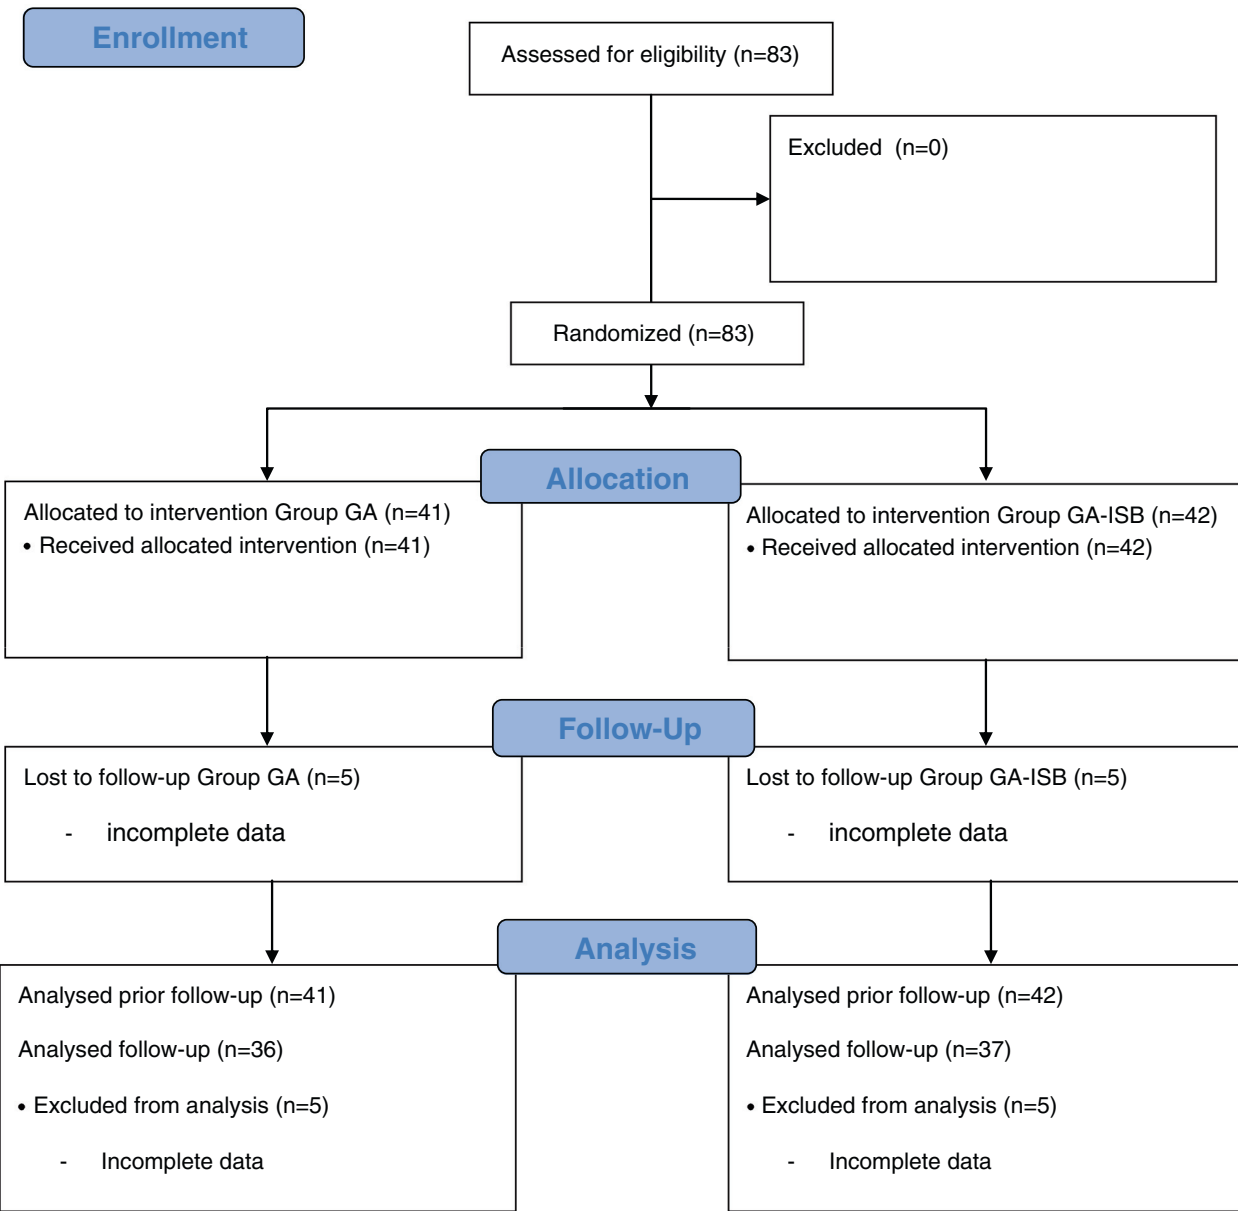

Supplement: MOESM1 [file 9429214]
